# Supplementary material for: Long‐term outcomes of polyacrylamide hydrogel treatment in women with stress urinary incontinence
Source: PubMed Central journal article supplement — BJU Int. 2022 Mar 7;130(Suppl 1):22–4. doi: 10.1111/bju.15717 (PMC9311695; doi:10.1111/bju.15717), 2022-03-07
Supplement: BJU-130-22-s001.pdf [file BJU-130-22-s001.pdf]

**Supplemental Appendix A.** Descriptive statistics for patient-reported outcome measures (PROMs) and the association between time since first injection and final assessment

| Measure/Variable | Timepoint     |    |    |                          |    |    |                               |    |    | Kendall's tau* | p-value |
|------------------|---------------|----|----|--------------------------|----|----|-------------------------------|----|----|----------------|---------|
|                  | Pre-operative |    |    | 4-weeks post-operatively |    |    | 3-105 months post-operatively |    |    |                |         |
|                  | n             | M  | SD | n                        | M  | SD | n                             | M  | SD |                |         |
| <b>UDI-6</b>     | 83            | 45 | 18 | 65                       | 32 | 18 | 107                           | 23 | 18 | -0.05          | 0.49    |
| <b>IIQ-7</b>     | 85            | 30 | 2  |                          |    |    | 107                           | 15 | 20 | -0.11          | 0.13    |
| <b>ICIQ-SF</b>   |               |    |    |                          |    |    | 107                           | 8  | 5  | <0.001         | 0.99    |

\* Kendall's tau used to assess the association between PROM total scores at follow-up and length of time between first injection and follow-up assessment.

n = number, M = mean, SD = standard deviation, UDI-6 = Urinary Distress Inventory Short Form, IIQ-7 = Incontinence Impact Questionnaire Short Form, ICIQ-SF = International Consultation on Incontinence Questionnaire Short Form
