# Supplementary material for: Long‐term outcomes of polyacrylamide hydrogel treatment in women with stress urinary incontinence
Source: PubMed Central journal article supplement — BJU Int. 2022 Mar 7;130(Suppl 1):22–4. doi: 10.1111/bju.15717 (PMC9311695; doi:10.1111/bju.15717), 2022-03-07
Supplement: BJU-130-22-s002.pdf [file BJU-130-22-s002.pdf]

**Supplemental Appendix B.** Patient-reported outcome measures by PGI-I classification (successful vs unsuccessful) and estimate of difference between means

| Measure/Variable                                             | PGI-I Outcome      |    |    |                      |    |    | Difference between means<br>(95% confidence interval) |              |
|--------------------------------------------------------------|--------------------|----|----|----------------------|----|----|-------------------------------------------------------|--------------|
|                                                              | Successful outcome |    |    | Unsuccessful outcome |    |    |                                                       |              |
|                                                              | n                  | M  | SD | n                    | M  | SD |                                                       |              |
| <b>Pre-operative</b>                                         |                    |    |    |                      |    |    |                                                       |              |
| UDI-6                                                        | 40                 | 43 | 19 | 43                   | 46 | 18 | 3                                                     | (5.4, 10.5)  |
| IIQ-7                                                        | 43                 | 30 | 21 | 42                   | 31 | 21 | 1                                                     | (-8.0, 10.3) |
| <b>4 weeks post-operatively</b>                              |                    |    |    |                      |    |    |                                                       |              |
| UDI-6                                                        | 35                 | 32 | 17 | 30                   | 32 | 20 | 0                                                     | (-9.2, 9.6)  |
| <b>Longer-term follow-up (3-105 months post-operatively)</b> |                    |    |    |                      |    |    |                                                       |              |
| UDI-6                                                        | 55                 | 16 | 16 | 52                   | 31 | 17 | 15                                                    | (8.7, 21.2)  |
| IIQ-7                                                        | 55                 | 8  | 16 | 52                   | 23 | 21 | 14                                                    | (6.9, 21.5)  |
| ICIQ-SF                                                      | 55                 | 6  | 4  | 52                   | 11 | 4  | 5                                                     | (3.9, 7.0)   |

PGI-I = Patient Global Impression of Improvement, n = number, M = mean, SD = standard deviation, UDI-6 = Urinary Distress Inventory Short Form, IIQ-7 = Incontinence Impact Questionnaire Short Form, ICIQ-SF = International Consultation on Incontinence Questionnaire Short Form
